# Supplementary material for: Blood-based host biomarker diagnostics in active case finding for pulmonary tuberculosis: A diagnostic case-control study
Source: PubMed Central journal article supplement — eClinicalMedicine. 2021 Mar 6;33:100776. doi: 10.1016/j.eclinm.2021.100776 (PMC8020164; doi:10.1016/j.eclinm.2021.100776), 2021-03-06
Supplement: mmc1.pdf [file mmc1.pdf]

## **Supplementary Material**

**Title:** Blood-based host biomarker diagnostics in active case finding for pulmonary tuberculosis: a diagnostic case-control study

### **Authors**

Flora Martinez Figueira Moreira, MS,<sup>1</sup> Renu Verma, PhD,<sup>2</sup> Paulo Cesar Pereira dos Santos, BS,<sup>1</sup> Alessandra Leite, BS,<sup>1</sup> Andrea da Silva Santos, PhD,<sup>1</sup> Rafaele Carla Pivetta de Araujo, MS,<sup>1</sup> Bruna Oliveira da Silva, BS,<sup>1</sup> Júlio Henrique Ferreira de Sá Queiroz, MS,<sup>1</sup> David H. Persing, PhD,<sup>3</sup> Erik Södersten, PhD,<sup>4</sup> Devasena Gnanashanmugam, MD,<sup>5</sup> Purvesh Khatri, PhD,<sup>2</sup> Julio Croda, PhD,<sup>4,5,6,\*</sup> Jason R. Andrews, MD<sup>2,\*</sup>

\*Contributed equally

### **Contents**

**Table A1:** Specificity at fixed sensitivity values, and sensitivity at fixed specificity values for CRP and Xpert-MTB-HR.

**STARD Checklist**

**Study CRF (Portuguese)**

**Study CRF (English Translation)**

**Table A1.** Specificity at fixed sensitivity values, and sensitivity at fixed specificity values for CRP and Xpert-MTB-HR.

| Sensitivity | Specificity |              | Sensitivity |      |              |
|-------------|-------------|--------------|-------------|------|--------------|
|             | CRP         | Xpert-MTB-HR | Specificity | CRP  | Xpert-MTB-HR |
| 0.70        | 0.74        | 0.80         | 0.70        | 0.73 | 0.81         |
| 0.75        | 0.67        | 0.78         | 0.75        | 0.69 | 0.78         |
| 0.80        | 0.56        | 0.73         | 0.80        | 0.65 | 0.70         |
| 0.85        | 0.42        | 0.62         | 0.85        | 0.61 | 0.64         |
| 0.90        | 0.28        | 0.53         | 0.90        | 0.58 | 0.57         |
| 0.95        | 0.14        | 0.36         | 0.95        | 0.51 | 0.48         |

CRP: C-reactive protein. Values were obtained from 5,000 bootstrap replicates.

| Section & Topic          | No         | Item                                                                                                                                                   | Reported on page #       |
|--------------------------|------------|--------------------------------------------------------------------------------------------------------------------------------------------------------|--------------------------|
| <b>TITLE OR ABSTRACT</b> |            |                                                                                                                                                        | <b>1</b>                 |
|                          | <b>1</b>   | Identification as a study of diagnostic accuracy using at least one measure of accuracy (such as sensitivity, specificity, predictive values, or AUC)  | 2                        |
| <b>ABSTRACT</b>          |            |                                                                                                                                                        | 2                        |
|                          | <b>2</b>   | Structured summary of study design, methods, results, and conclusions (for specific guidance, see STARD for Abstracts)                                 | 2                        |
| <b>INTRODUCTION</b>      |            |                                                                                                                                                        | 3                        |
|                          | <b>3</b>   | Scientific and clinical background, including the intended use and clinical role of the index test                                                     | 3                        |
|                          | <b>4</b>   | Study objectives and hypotheses                                                                                                                        | 3                        |
| <b>METHODS</b>           |            |                                                                                                                                                        | 4                        |
| <i>Study design</i>      | <b>5</b>   | Whether data collection was planned before the index test and reference standard were performed (prospective study) or after (retrospective study)     | 4                        |
| <i>Participants</i>      | <b>6</b>   | Eligibility criteria                                                                                                                                   | 4                        |
|                          | <b>7</b>   | On what basis potentially eligible participants were identified (such as symptoms, results from previous tests, inclusion in registry)                 | 4                        |
|                          | <b>8</b>   | Where and when potentially eligible participants were identified (setting, location and dates)                                                         | 4                        |
|                          | <b>9</b>   | Whether participants formed a consecutive, random or convenience series                                                                                | 5                        |
| <i>Test methods</i>      | <b>10a</b> | Index test, in sufficient detail to allow replication                                                                                                  | 4                        |
|                          | <b>10b</b> | Reference standard, in sufficient detail to allow replication                                                                                          | 4                        |
|                          | <b>11</b>  | Rationale for choosing the reference standard (if alternatives exist)                                                                                  | 4                        |
|                          | <b>12a</b> | Definition of and rationale for test positivity cut-offs or result categories of the index test, distinguishing pre-specified from exploratory         | 4                        |
|                          | <b>12b</b> | Definition of and rationale for test positivity cut-offs or result categories of the reference standard, distinguishing pre-specified from exploratory | 4                        |
|                          | <b>13a</b> | Whether clinical information and reference standard results were available to the performers/readers of the index test                                 | 4                        |
|                          | <b>13b</b> | Whether clinical information and index test results were available to the assessors of the reference standard                                          | 4                        |
| <i>Analysis</i>          | <b>14</b>  | Methods for estimating or comparing measures of diagnostic accuracy                                                                                    | 4,5                      |
|                          | <b>15</b>  | How indeterminate index test or reference standard results were handled                                                                                | 4,5                      |
|                          | <b>16</b>  | How missing data on the index test and reference standard were handled                                                                                 | 4,5                      |
|                          | <b>17</b>  | Any analyses of variability in diagnostic accuracy, distinguishing pre-specified from exploratory                                                      | 4,5                      |
|                          | <b>18</b>  | Intended sample size and how it was determined                                                                                                         | 4                        |
| <b>RESULTS</b>           |            |                                                                                                                                                        | 6                        |
| <i>Participants</i>      | <b>19</b>  | Flow of participants, using a diagram                                                                                                                  | 16                       |
|                          | <b>20</b>  | Baseline demographic and clinical characteristics of participants                                                                                      | 6,14                     |
|                          | <b>21a</b> | Distribution of severity of disease in those with the target condition                                                                                 | 6                        |
|                          | <b>21b</b> | Distribution of alternative diagnoses in those without the target condition                                                                            | 6                        |
|                          | <b>22</b>  | Time interval and any clinical interventions between index test and reference standard                                                                 | 4,6                      |
| <i>Test results</i>      | <b>23</b>  | Cross tabulation of the index test results (or their distribution) by the results of the reference standard                                            | 6                        |
|                          | <b>24</b>  | Estimates of diagnostic accuracy and their precision (such as 95% confidence intervals)                                                                | 6                        |
|                          | <b>25</b>  | Any adverse events from performing the index test or the reference standard                                                                            | N/A (not clinical trial) |
| <b>DISCUSSION</b>        |            |                                                                                                                                                        | 8                        |
|                          | <b>26</b>  | Study limitations, including sources of potential bias, statistical uncertainty, and generalisability                                                  | 9                        |
|                          | <b>27</b>  | Implications for practice, including the intended use and clinical role of the index test                                                              | 8                        |
| <b>OTHER INFORMATION</b> |            |                                                                                                                                                        |                          |
|                          | <b>28</b>  | Registration number and name of registry                                                                                                               | N/A (not clinical trial) |

---

|    |                                                       |                          |
|----|-------------------------------------------------------|--------------------------|
| 29 | Where the full study protocol can be accessed         | N/A (not clinical trial) |
| 30 | Sources of funding and other support; role of funders | 11                       |

---

# CRF I - Questionário

Record ID

Código do estudo: ISI

Toda amostra que for armazenada em em biorrepositório será identificada da seguinte forma:

ISI.record\_id.codigo\_do\_tipo\_de\_amostra.aliquota

Data e hora da assinatura do TCLE

Data e hora da coleta de dados:

(Ex: 17-06-2017 08:45)

Qual seu nome completo?

(Tudo em letra maiúscula, não colocar acento.  
Ex: JOAO SILVA CARVALHO)

Qual a sua data de nascimento?

(Ex: 24-05-1987)

Idade:

Qual o seu peso?

(Ex: 70, 80, 95)

Qual sua altura?

(Colocar em cm. Ex: 168, 176, 184)

Presidio da coleta de dados:

PED    EPJFC    IPCG  
 CT  
(Estabelecimento penal)

---

Se PED, qual bloco você está?

- Raio 1
- Raio 2A
- Raio 2B
- Raio 3A
- Raio 3B
- Raio 4
- Linear 1A
- Linear 2A
- Linear 3A
- Linear 4A
- Linear A - CD
- Linear 1B
- Linear 2B
- Linear 3B
- Linear 4B
- CD
- ADM

---

Se EPJFC, qual bloco você está?

- P1
- P1 (Disciplinar)
- P2
- P2 (Disciplinar)
- P3
- P4
- P6 (RDD)

---

Se IPCG, qual bloco você está?

- 1A - Solário 1A
- 1A - Solário 2A
- 1A - Solário 3A
- 1B - Solário 1B
- 1B - Solário 2B
- 1B - Solário 3B
- 2A - Solário 1A
- 2A - Solário 2A
- 2A - Solário 3A
- 2B - Solário 1B
- 2B - Solário 2B
- 2B - Solário 3B
- 2B - Solário G
- 2B - CD

---

Se CT, qual bloco você está?

- P1
- P1 disciplinar
- P2

---

Qual o número da sua cela?

\_\_\_\_\_

(Ex: 2, 23, 47)

---

Está na mesma cela há mais de 2 semanas?

- Sim    Não

---

Se não, qual o seu pavilhão, bloco e cela anterior?

\_\_\_\_\_

---

Data da prisão

\_\_\_\_\_

---

Você já foi preso outras vezes?

- Yes    No

---

Se sim, quantas vezes foi preso, incluindo esta vez?

---

Qual sua raça?

- branca  preta  parda  
 amarela  indígena

Até que série escolar você estudou?

- Sem escolaridade  
 1-4 série do ensino fundamental incompleto  
 1-4 série do ensino fundamental completo  
 5-8 série do ensino fundamental incompleto  
 5-8 série do ensino fundamental completo  
 Ensino médio incompleto  
 Ensino médio completo  
 Ensino superior incompleto  
 Ensino superior completo

Você fuma?

- Yes  No

Quantos cigarros você fuma por dia?

\_\_\_\_\_  
(Ex: 1, 2, 10)

Você já fumou?

- Yes  No

Com que frequência você toma bebidas alcoólicas?

- Nunca bebi  
 Não bebo mais  
 Uma vez por mês ou menos  
 Duas a quatro vezes por mês  
 Duas a três vezes por semana  
 Quatro ou mais vezes por semana

Você usou maconha no último ano?

- Yes  No

Você usou cocaína no último ano?

- Yes  No

Você usou crack no último ano?

- Yes  No

Você usou heroína no último ano?

- Yes  No

Você cheirou cola e/ou outros solventes no último ano?

- Yes  No

Você usou pasta base no último ano?

- Yes  No

Você usou haxixe no último ano?

- Yes  No

Você usou droga injetável no último ano?

- Yes  No

Você já teve tuberculose?

- Yes  No

Você está em tratamento de tuberculose?

- Yes  No

Você conhece ou já conheceu alguém com tuberculose?

- Yes  No

---

Se sim, como é ou era o contato com essa pessoa?

- Não tive contato  
 Menos de 1 vez/semana  
 1-2 vezes/semana  
 Mais de 2 vezes/semana  
 Todos os dias

---

Você tem a marca da vacina BCG no braço direito?  
Posso ver?

- Yes  No  
(Visualizar a marca.)

---

Tem pessoas na sua cela com tosse, febre, ou emagrecendo?

- Yes  No

---

Você está com tosse?

- Yes  No

---

Se sim, há quantas semanas?

\_\_\_\_\_  
(Ex: 1, 2, 3, 4)

---

Você tem expectoração?

- Yes  No

---

Se sim, quantas semanas?

\_\_\_\_\_  
(Ex: 1, 2, 3)

---

Se sim, sua expectoração tem sangue?

- Yes  No

---

Você está com febre?

- Yes  No

---

Se sim, há quantas semanas?

\_\_\_\_\_  
(Ex: 1, 2, 3, 4)

---

Você está sem apetite?

- Yes  No

---

Se sim, há quantas semanas?

\_\_\_\_\_

---

Você está emagrecendo?

- Yes  No

---

Se sim, quantos quilos?

\_\_\_\_\_  
(Ex, 1, 2, 3)

---

Você tem sudorese noturna?

- Yes  No

---

Se sim, há quantas semanas?

\_\_\_\_\_

---

Você está com dor torácica?

- Yes  No

---

Se sim, há quantas semanas?

\_\_\_\_\_

---

Você está sentindo dificuldade para respirar?

- Yes  No



---

Se sim, há quantas semanas?

\_\_\_\_\_

---

Coletou primeira amostra de escarro?

Yes  No

---

Data e hora da coleta de escarro:

\_\_\_\_\_

(Ex: 11-08-2017 14:15)

---

Realizou RaioX?

Yes  No

---

Data e hora do RaioX

\_\_\_\_\_

# CRF 1 - Questionnaire

Strategies for tuberculosis control in prisons

Page 1

Record ID

---

Study code: ISI

Any sample that is stored in a biorepository will be identified as follows:

ISI.record\_id.codigo\_do\_type\_de\_sample.aliquot

Consent signature date and time

---

Date and time of data collection:

---

(Ex: 17-06-2017 08:45)

What is your full name?

---

(All in capital letters, do not put an accent.  
Ex: JOAO SILVA CARVALHO)

What is your date of birth?

---

(Ex: May 24, 1987)

Age:

---

What is your weight?

---

(Ex: 70, 80, 95)

What's your height?

---

(Put in cm. Ex: 168, 176, 184)

Presidency of data collection:

PED      EPJFC      IPCG  
CT  
(Penal establishment)

If PED, which block are you in?

Radius 1  
Radius 2A  
Radius 2B  
Radius 3A  
Radius 3B  
Radius 4  
Linear 1A  
Linear 2A  
Linear 3A  
Linear 4A  
Linear A - CD  
Linear 1B  
Linear 2B  
Linear 3B  
Linear 4B  
CD  
ADM

If EPJFC, which block are you on?

P1  
P1 (Disciplinary)  
P2  
P2 (Disciplinary)  
P3  
P4  
P6 (RDD)

If IPCG, which block are you in?

1A - Solarium 1A  
1A - Solarium 2A  
1A - Solarium 3A  
1B - Solarium 1B  
1B - Solarium 2B  
1B - Solarium 3B  
2A - Solarium 1A  
2A - Solarium 2A  
2A - Solarium 3A  
2B - Solarium 1B  
2B - Solarium 2B  
2B - Solarium 3B  
2B - Solarium G  
2B - CD

If CT, which block are you in?

P1  
Disciplinary P1  
P2

What is your cell number?

\_\_\_\_\_  
(Ex: 2, 23, 47)

Have you been in the same cell for more than 2 weeks?

Yes      No

If not, what is your pavilion, block and previous cell?

\_\_\_\_\_

Date of arrest

\_\_\_\_\_

Have you ever been arrested before?

Yes      No

**Page 3**

If so, how many times have you been arrested, including this time?

\_\_\_\_\_

What is your race?

white              black              brown  
Yellow              indigenous

Up to which grade did you study?

No schooling  
1-4 grade of elementary school incomplete  
1-4 grade of elementary school complete  
5-8 grade of elementary school incomplete  
5-8 grade of complete elementary school  
Incomplete high school  
Complete high school  
Incomplete higher education  
Complete higher education

You smoke?

Yes      No

How many cigarettes do you smoke per day?

\_\_\_\_\_  
(Ex: 1, 2, 10)

Have you ever smoked?

Yes      No

How often do you drink alcohol?

Never drank  
I don't drink anymore  
Once a month or less  
Two to four times a month  
Two to three times a week

Four or more times a week

|                                                              |     |    |
|--------------------------------------------------------------|-----|----|
| Have you used marijuana in the last year?                    | Yes | No |
| Have you used cocaine in the last year?                      | Yes | No |
| Did you use crack in the last year?                          | Yes | No |
| Have you used heroin in the last year?                       | Yes | No |
| Did you smell glue and / or other solvents in the last year? | Yes | No |
| Have you used base paste in the last year?                   | Yes | No |
| Have you used hashish in the last year?                      | Yes | No |
| Have you used injecting drugs in the last year?              | Yes | No |
| Have you ever had tuberculosis?                              | Yes | No |
| Are you under treatment for tuberculosis?                    | Yes | No |
| Do you know or have you ever met someone with tuberculosis?  | Yes | No |

---

**Page 4**

|                                                                   |                                                                                                          |                         |
|-------------------------------------------------------------------|----------------------------------------------------------------------------------------------------------|-------------------------|
| If so, how is or was the contact with that person?                | I had no contact<br>Less than 1 time / week<br>1-2 times / week<br>More than 2 times / week<br>Every day |                         |
| Do you have the BCG vaccine mark on your right arm?<br>May I see? | Yes                                                                                                      | No<br>(View the brand.) |
| Do people in your cell have a cough, fever, or losing weight?     | Yes                                                                                                      | No                      |
| Are you coughing?                                                 | Yes                                                                                                      | No                      |
| If so, how many weeks ago?                                        | <hr/> (Ex: 1, 2, 3, 4)                                                                                   |                         |
| Do you have sputum?                                               | Yes                                                                                                      | No                      |

If so, how many weeks?

\_\_\_\_\_  
(Ex: 1, 2, 3)

If so, does your sputum have blood?

Yes No

Do you have a fever?

Yes No

If so, how many weeks ago?

\_\_\_\_\_  
(Ex: 1, 2, 3, 4)

Do you have loss of appetite?

Yes No

If so, for how many weeks?

\_\_\_\_\_

Are you losing weight?

Yes No

If so, how many kilos?

\_\_\_\_\_  
(Ex, 1, 2, 3)

Do you have night sweats?

Yes No

If so, for how many weeks?

\_\_\_\_\_

Are you having chest pain?

Yes No

If so, for how many weeks?

\_\_\_\_\_

Are you having trouble breathing?

Yes No

**Page 5**

If so, for how many weeks?

\_\_\_\_\_

Did you collect the first sputum sample?

Yes No

Sputum collection date and time:

\_\_\_\_\_  
(Ex: 11-08-2017 14:15)

Did you perform X-ray?

Yes No

X-ray date and time
